# Supplementary material for: Highly sensitive detection of Tb3+ and ATP based on a novel asymmetric anthracene derivative
Source: Royal Society of Chemistry journal article supplement (doi:10.1039/d1ay01279g), 2021-12-20
Supplement: d1ay01279g1.pdf [file d1ay01279g1.pdf]

## Supporting information

### Highly Sensitive Detection of Tb<sup>3+</sup> and ATP Based on A Novel Asymmetric Anthracene Derivatives

Song Zhao,<sup>a</sup> Hongbo Jiang,<sup>b</sup> Chengbin Gong,<sup>c</sup> Wenjing Qi,<sup>a</sup> Lianzhe Hu,<sup>a</sup>  
Yan Zhang,<sup>a\*</sup>

<sup>a</sup> Chongqing Key Laboratory of Green Synthesis and Applications,  
College of Chemistry, Chongqing Normal University, Chongqing,  
401331, P. R. China.

<sup>b</sup> Chongqing Bashu Secondary School, Chongqing, 400013, P. R. China.

<sup>c</sup> The Key Laboratory of Applied Chemistry of Chongqing Municipality,  
Chongqing Key Laboratory of Soft-Matter Material Chemistry and  
Function Manufacturing, College of Chemistry and Chemical engineering,  
Southwest University, Chongqing, 400715, China

Z51 1H NMR/14  
Z51 1H NMR

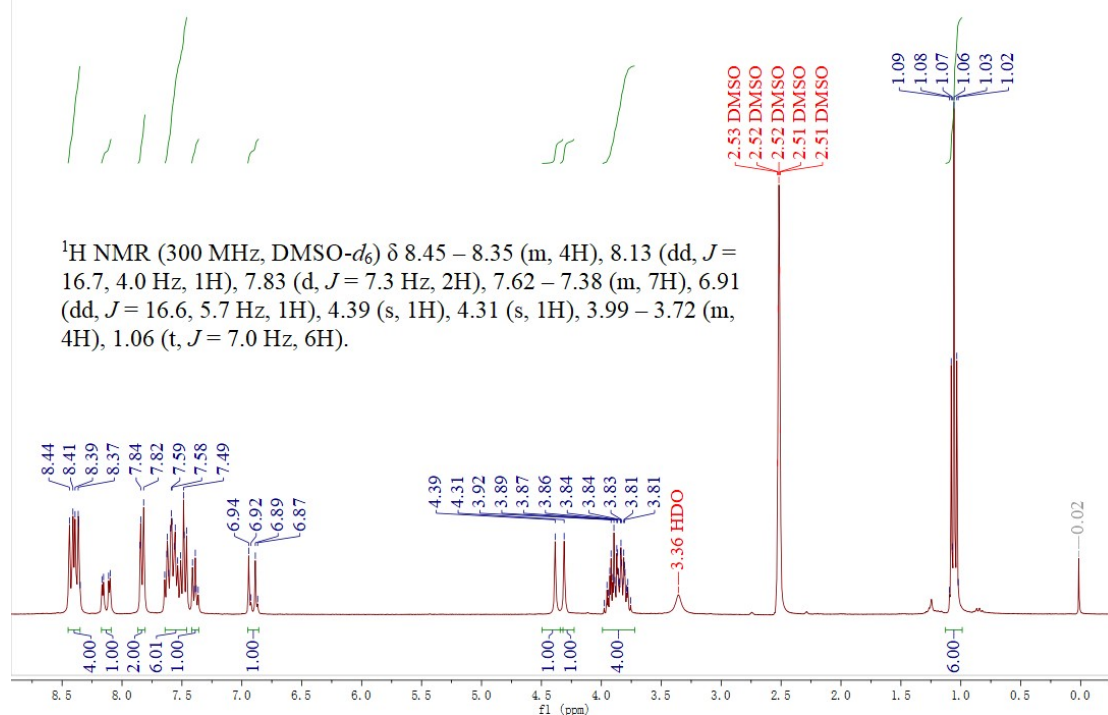

Figure S1.  $^1\text{H NMR}$  spectra of SSAP in  $\text{DMSO-}d_6$ .

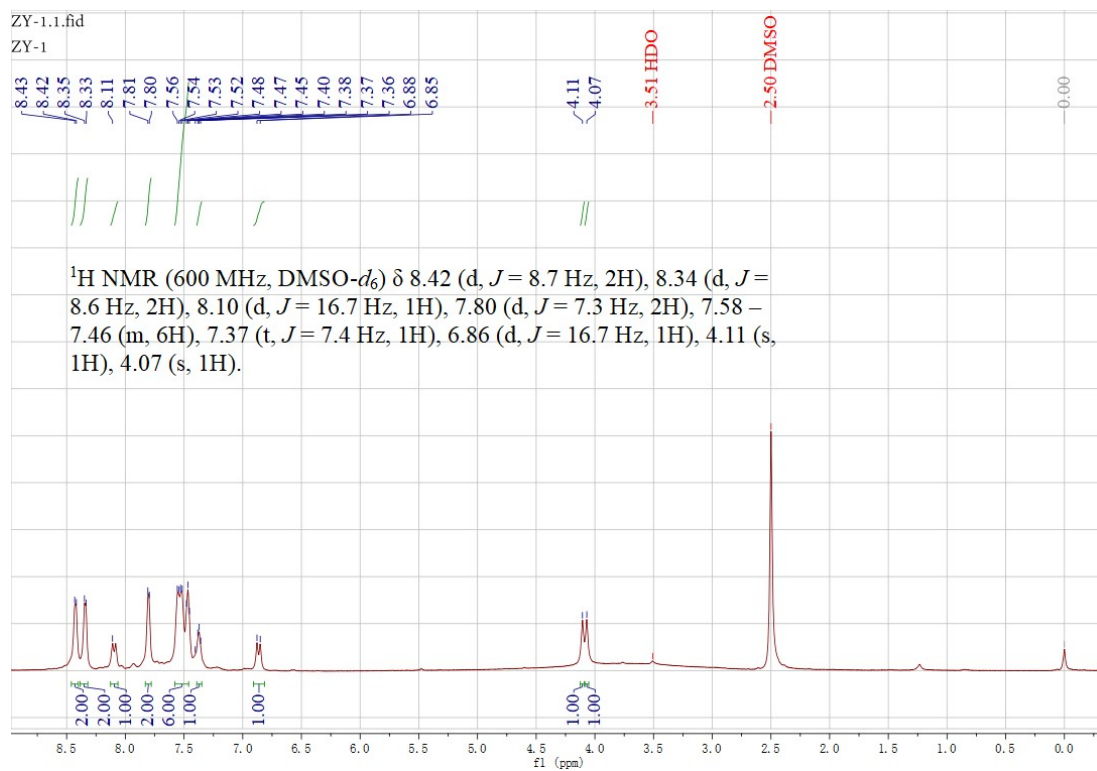

Figure S2.  $^1\text{H}$  NMR spectra of SSAPA in  $\text{DMSO-d}_6$ .

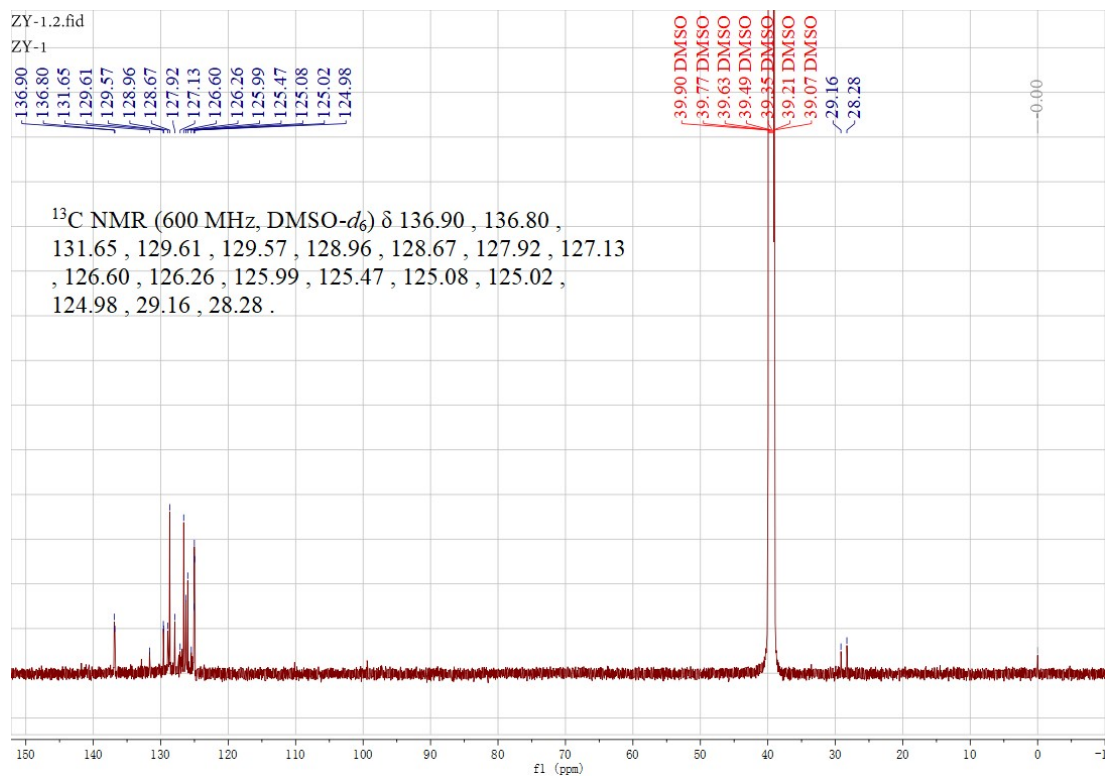

Figure S3.  $^{13}\text{C}$  NMR spectra of SSAPA in  $\text{DMSO-d}_6$ .

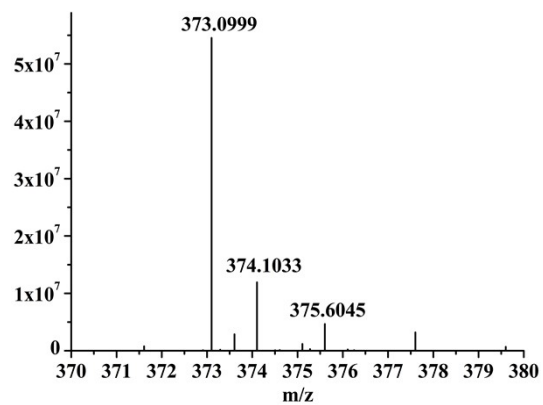

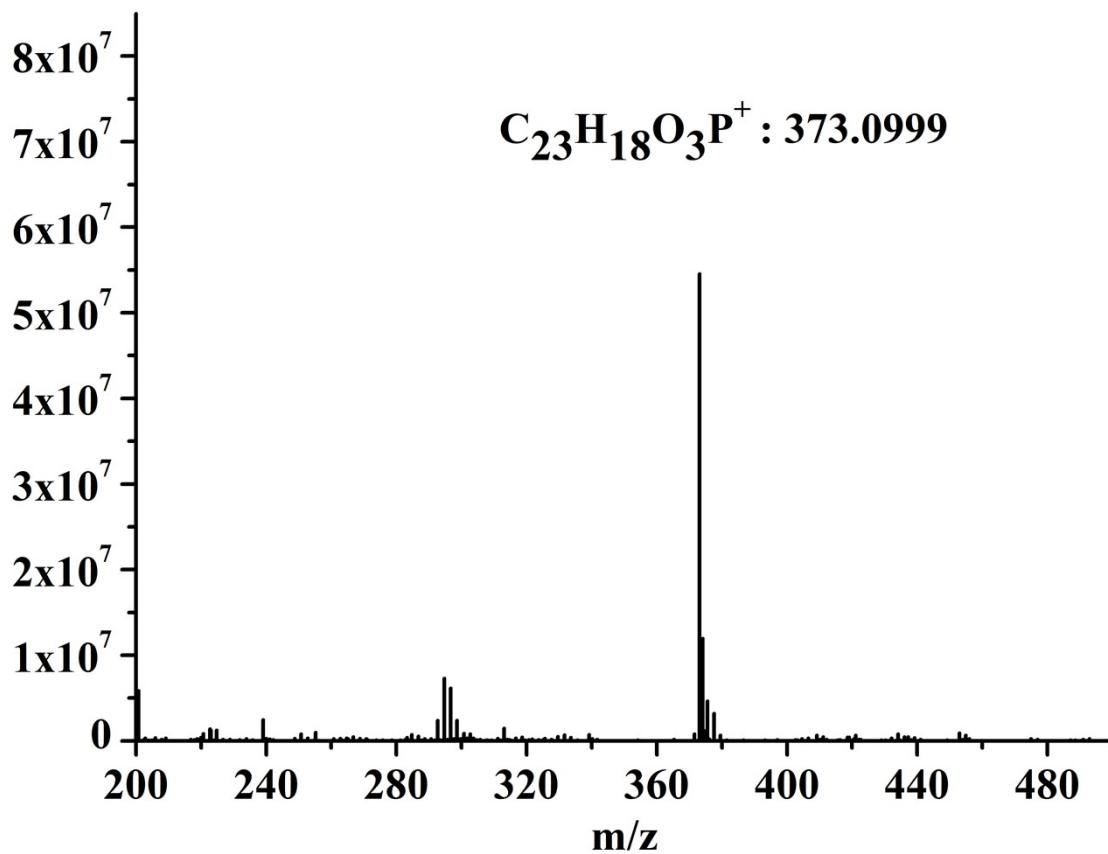

Figure S4. The HRMS spectra of SSAPA.

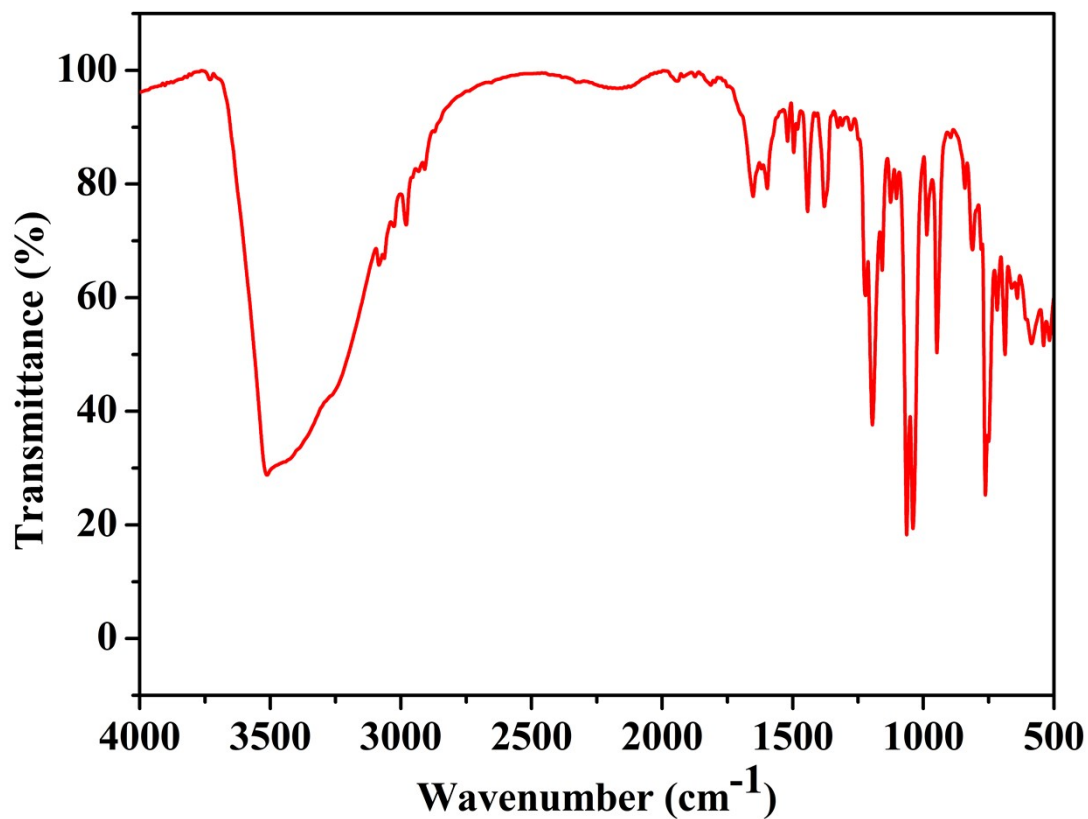

Figure S5. The Infrared spectra of SSSAPA.

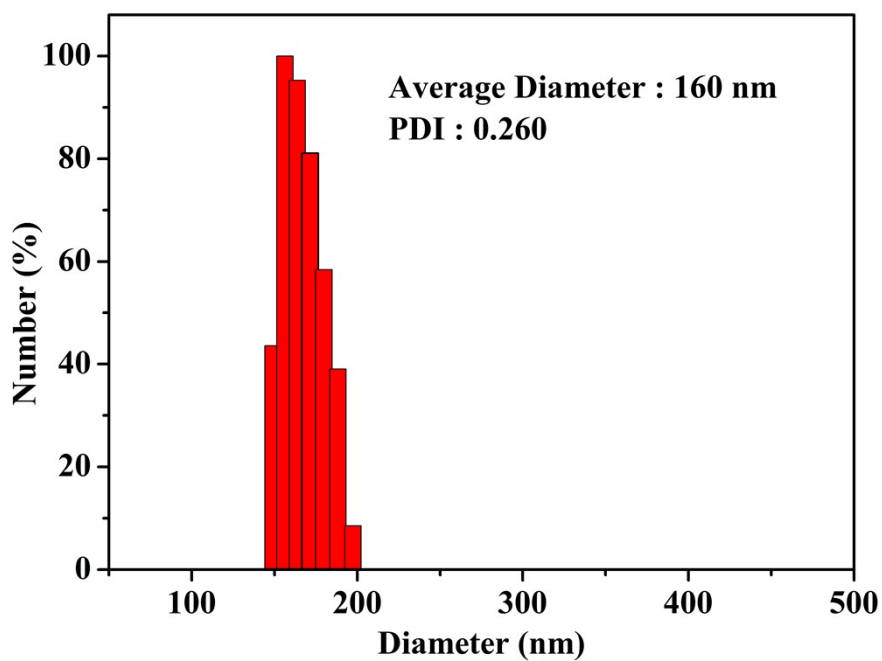

Figure S6. DLS data showing particle sizes of SSAPA in water.

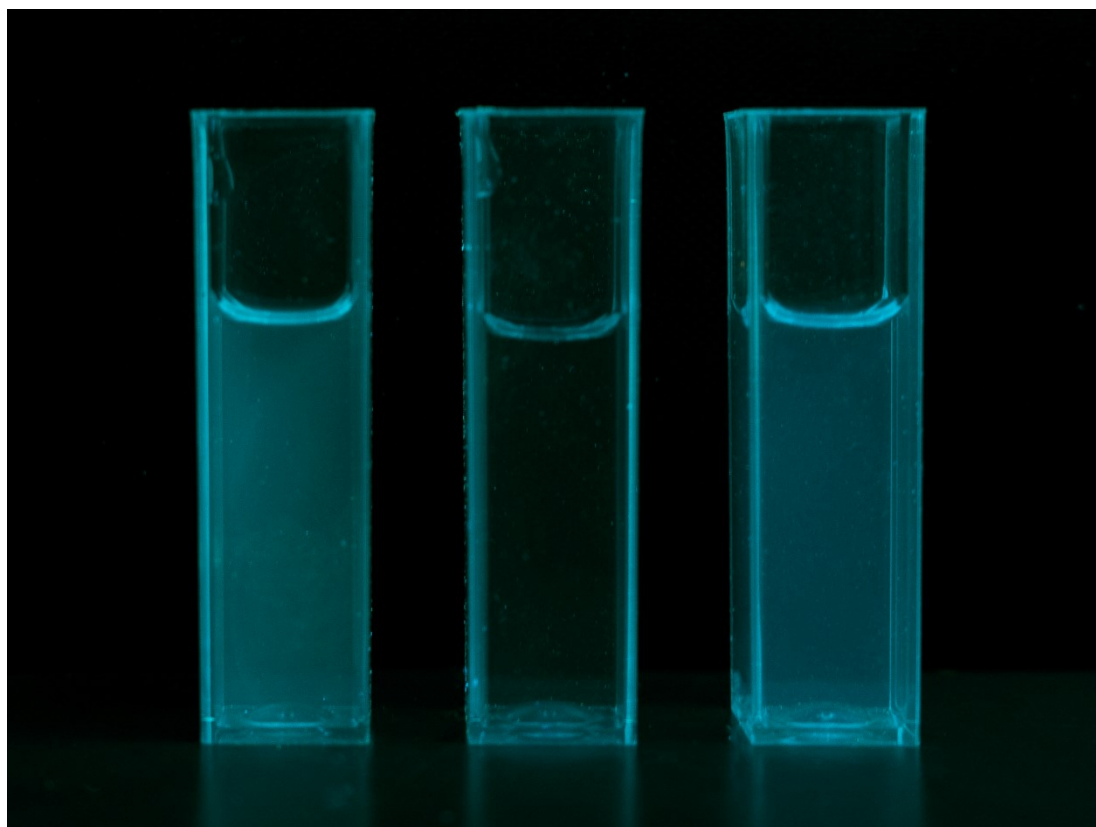

Figure S7. Fluorescence images of SSAPA (left), SSAPA/Tb<sup>3+</sup> complex (middle), and SSAPA/Tb<sup>3+</sup>/ATP complex (right).

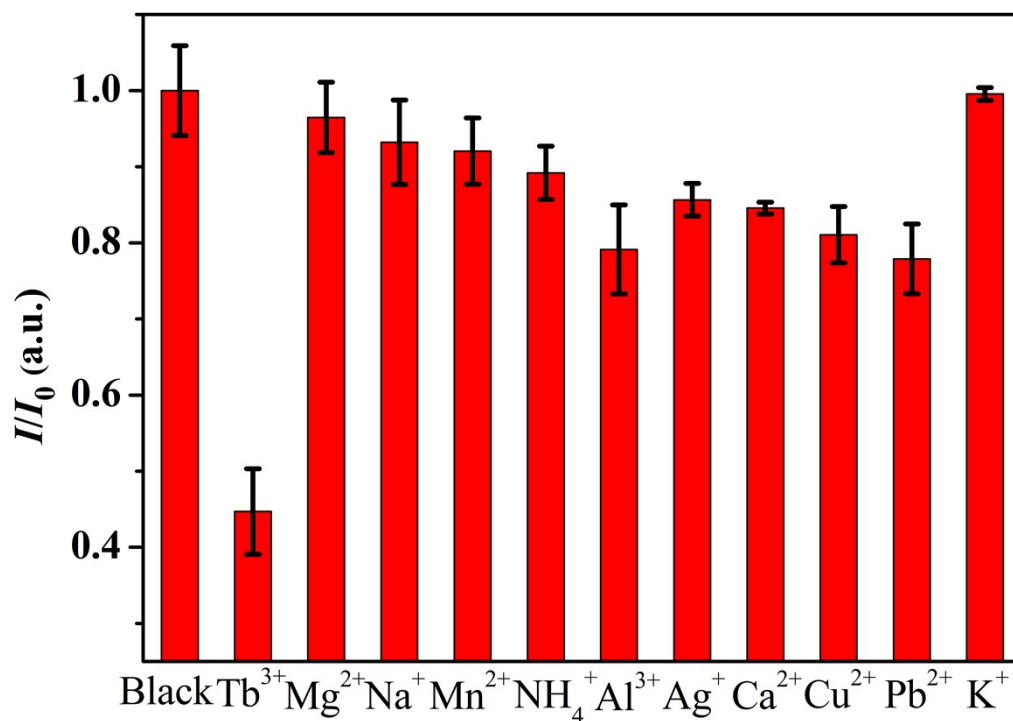

Figure S8. The quenching percentage of SSAPA (0.1  $\mu$ M) in the presence of the possible interfering species. The concentration was 10  $\mu$ M for interfering species and the concentration of Tb<sup>3+</sup> is 1  $\mu$ M. The fluorescence intensities of SSAPA in the absence or presence of different interfering substances are denoted by  $I$  and  $I_0$ .

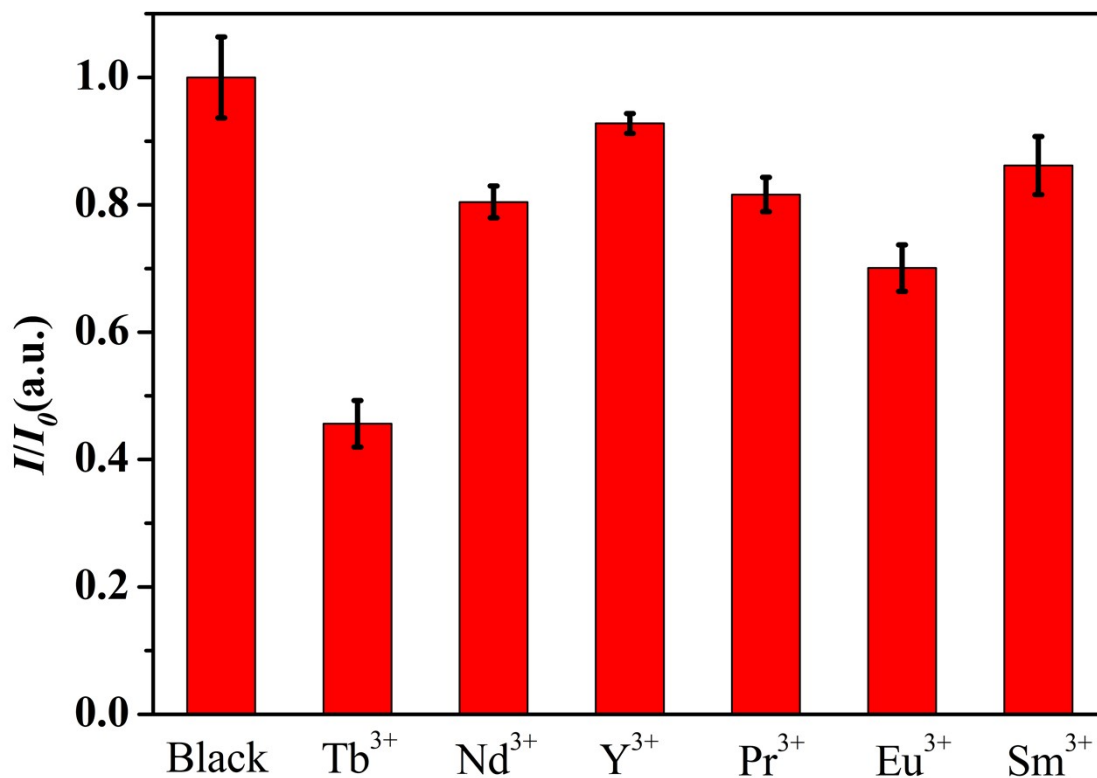

Figure S9. The quenching percentage of SSAPA (0.1  $\mu$ M) in the presence of the possible interfering other lanthanide ions. The concentration was 1  $\mu$ M for interfering species and the concentration of  $Tb^{3+}$  is 1 $\mu$ M. The fluorescence intensities of SSAPA in the absence or presence of different interfering substances are denoted by  $I$  and  $I_0$ .

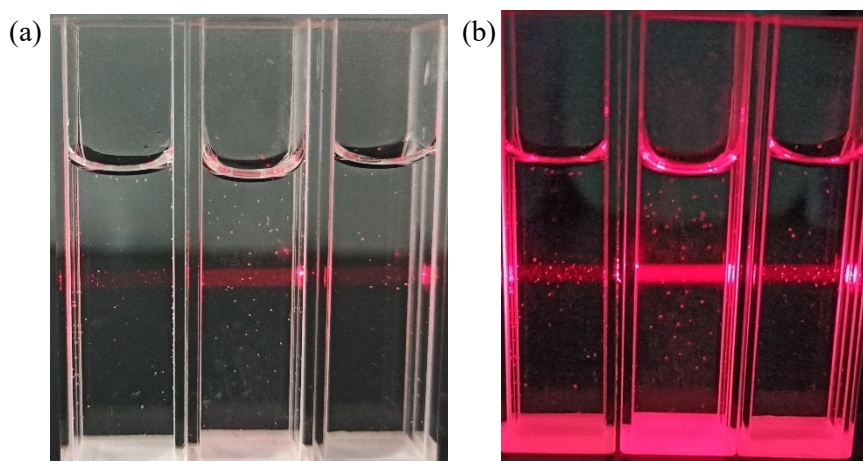

Figure S10. Tyndall Effect images of SSAPA (left), SSAPA/Tb<sup>3+</sup> complex (middle), and

| Probe                           | LOD     | Ref.      |
|---------------------------------|---------|-----------|
| SSAPA                           | 2.8 nM  | This work |
| Schiff's base                   | 0.63 μM | 1         |
| Rare Earths with Xylenol Orange | 0.3 μM  | 2         |

SSAPA/Tb<sup>3+</sup>/ATP complex (right) , under day light (a) and Under the dark (b).

Table S1. Comparison of the sensing performance of some reported probes for Tb<sup>3+</sup>.

Table S2. Comparison of the sensing performance of some reported probes for ATP.

| Probe                  | LOD    | Ref.      |
|------------------------|--------|-----------|
| SSAPA/Tb <sup>3+</sup> | 4.5 nM | This work |



|                                                  |         |   |
|--------------------------------------------------|---------|---|
| MoS <sub>2</sub> QDs/Fe <sup>3+</sup>            | 5 μM    | 3 |
| AuNPs /Tb-CDs                                    | 8.5 nM  | 4 |
| norfloxacin–Tb <sup>3+</sup>                     | 41.3 nM | 5 |
| H <sub>2</sub> dtoaCu (Metal-organic Frameworks) | 8.19 nM | 6 |
| TPE-COOH/Cu <sup>2+</sup>                        | 4.5nM   | 7 |

Table S3. Analytical results in the serum sample containing 5% goat serum. (n=3).

| Serum Samples | Spiked (μM) | Found (μM) | Recovery (%) | RSD (%) |
|---------------|-------------|------------|--------------|---------|
| Samble 1      | 0.2         | 0.212±0.12 | 107          | 5.64    |
| Samble 2      | 0.3         | 0.314±0.08 | 105          | 4.22    |
| Samble 3      | 0.4         | 0.409±0.05 | 102          | 2.54    |

Table S4. Analytical results in the serum sample containing 4% goat serum. (n=3).

| Serum Samples | Spiked (μM) | Found (μM) | Recovery (%) | RSD (%) |
|---------------|-------------|------------|--------------|---------|
|---------------|-------------|------------|--------------|---------|

|          |     |            |     |      |
|----------|-----|------------|-----|------|
| Samble 1 | 0.2 | 0.209±0.08 | 105 | 4.38 |
| Samble 2 | 0.3 | 0.307±0.11 | 102 | 4.88 |
| Samble 3 | 0.4 | 0.405±0.05 | 101 | 3.26 |

## References

1. H. A. Zamani, M. S. Zabihi, M. Rohani, A. Zangeneh-Asadabadi, M. R. Ganjali, F. Faridbod and S. Meghdadi, *Materials Science and Engineering: C*, 2011, **31**, 409-413.
2. J. H. Ales HRDLIC KAt, Carlos MORENO and Manuel VALIENTE, 1991, **7**, 925-929.
3. Y. Zhong and T. Yi, *Journal of Materials Chemistry B*, 2019, **7**, 2549-2556.
4. M. Xu, Z. Gao, Q. Zhou, Y. Lin, M. Lu and D. Tang, *Biosensors and Bioelectronics*, 2016, **86**, 978-984.
5. B. Yma, A. Jl, A. Fh and A. Cj, *Journal of Luminescence*, 2006, **116**, 67-72.
6. X. M. Hai, N. Li, K. Wang, Z. Q. Zhang, J. Zhang and F. Q. Dang, *Analytica Chimica Acta*, 2018, **998**, 60-89.
7. L.-Y. Geng, Y. Zhao, E. Kamyra, J.-T. Guo, B. Sun, Y.-K. Feng, M.-F. Zhu and X.-K. Ren, *Journal of Materials Chemistry C*, 2019, **7**, 2640-2645.
